# Supplementary material
Source: PubMed Central journal article supplement (PMC8254798)
Supplement: NIHMS1692692-supplement-2.pdf [file NIHMS1692692-supplement-2.pdf]

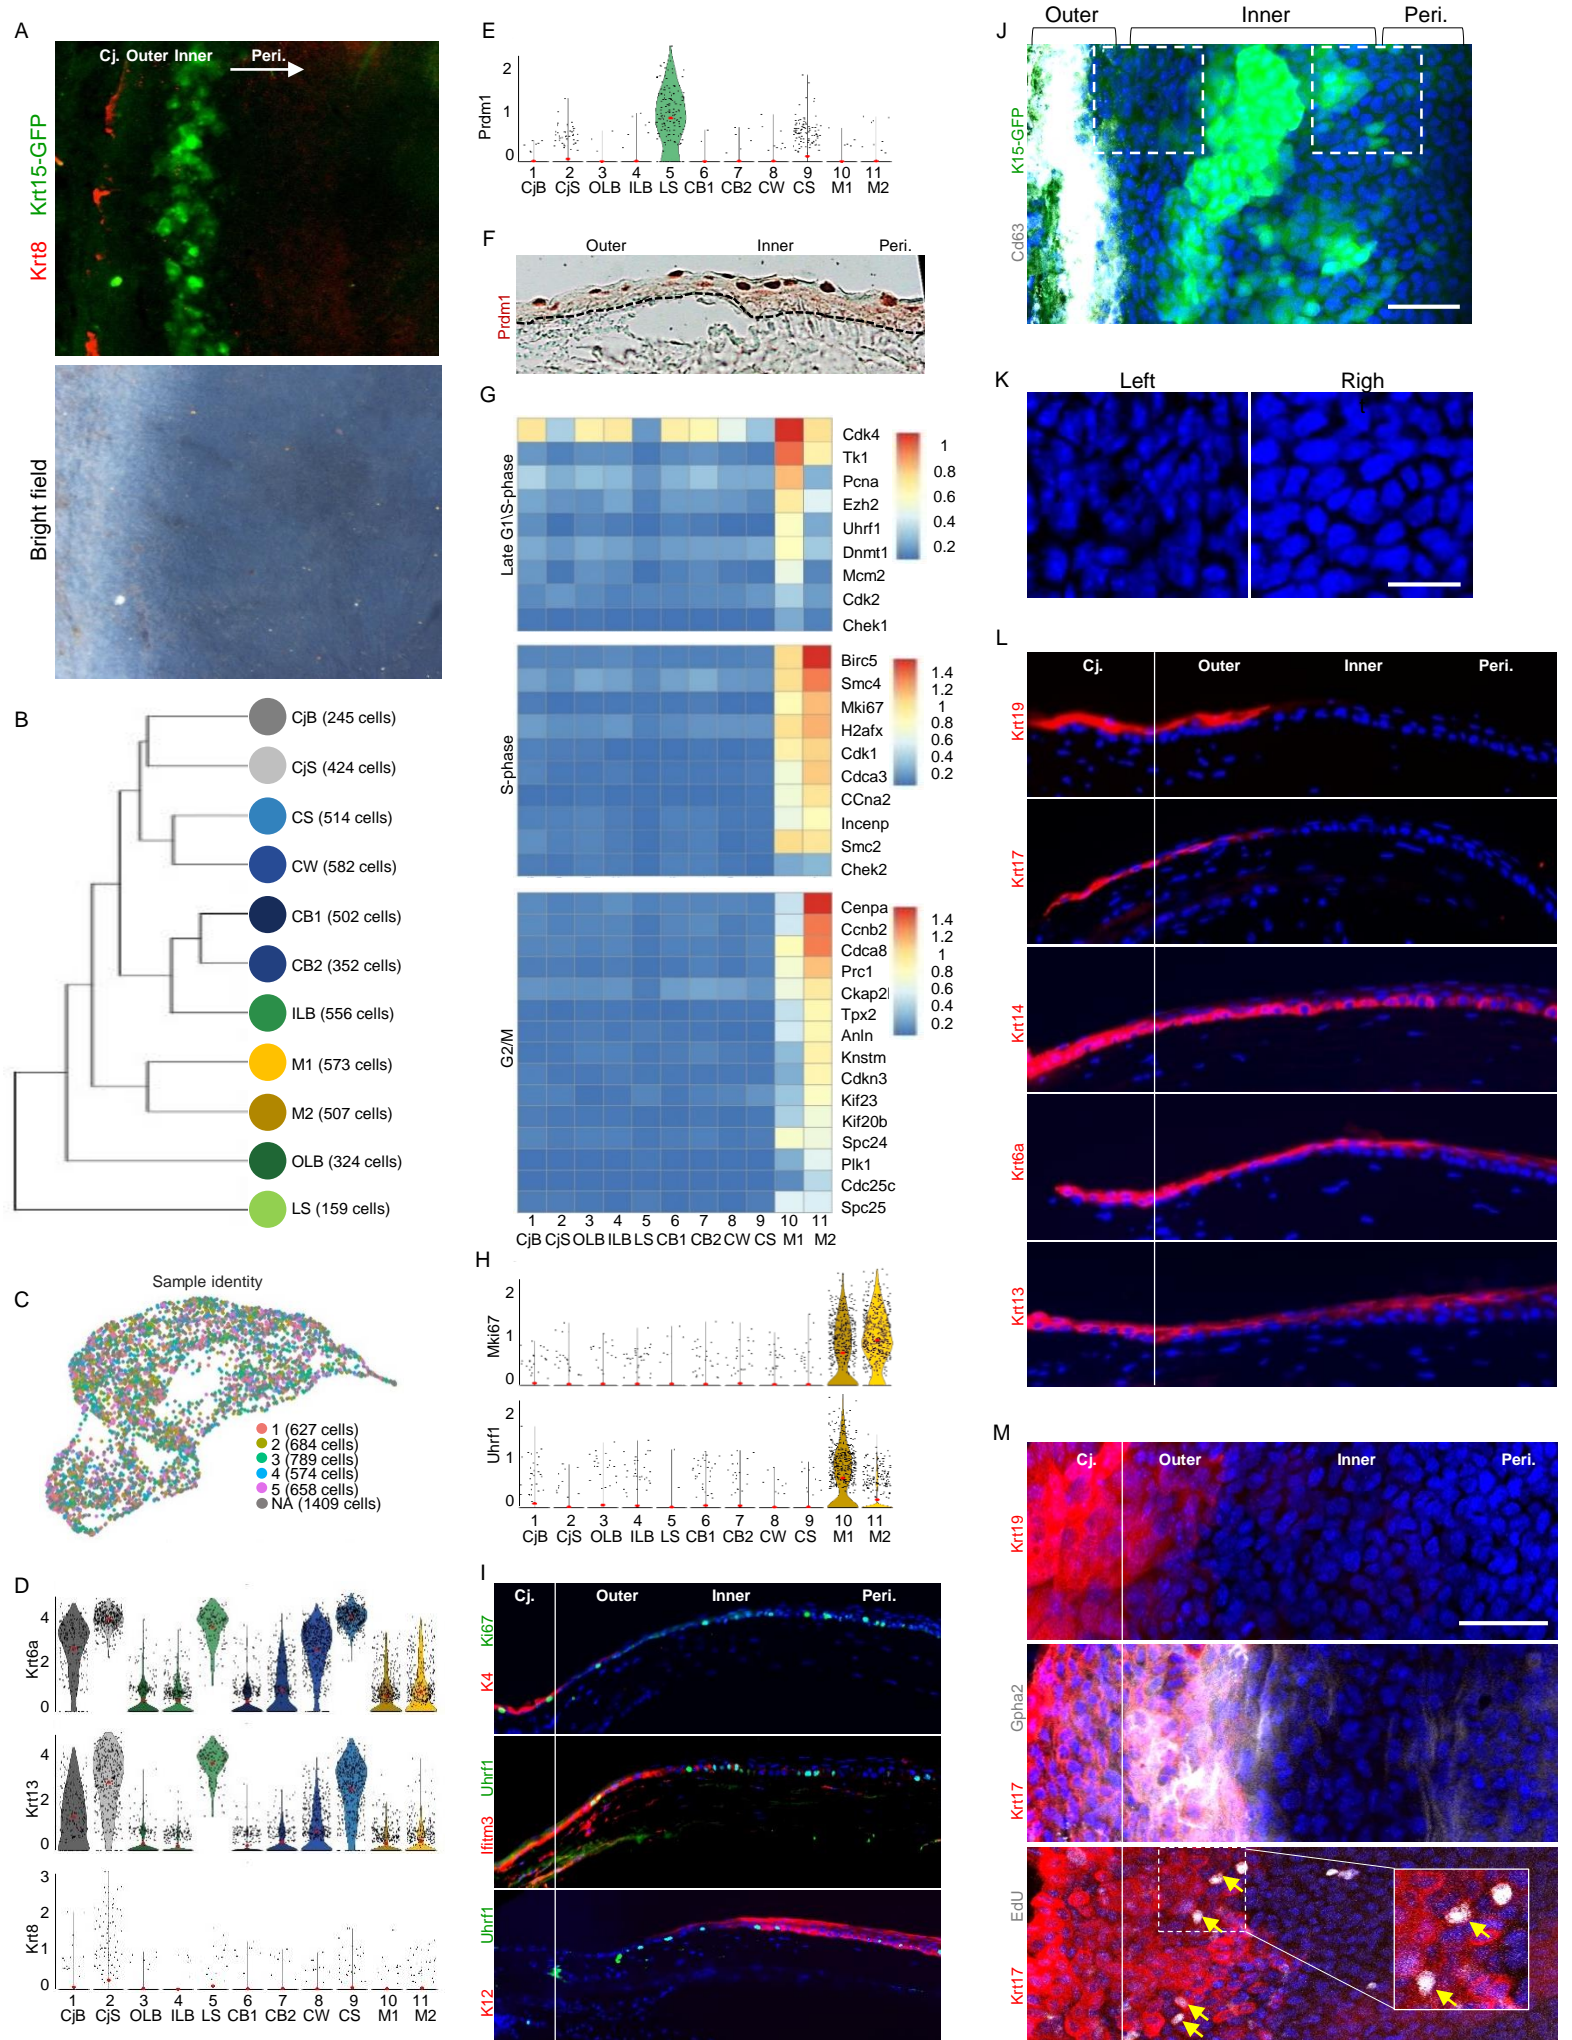

**Figure S1: Exploration and validation of the identity of cell populations (related to figure 1).** Corneas of adult 2-3 months old Krt15-GFP mice were used for analysis. (A) Whole-mount immunostaining of Krt8 (upper panel) and bright-field image of the same zone (lower panel). (B) Hierarchical clustering of gene expression data from scRNA-seq and the number of cells in brackets. (C) UMAP plot represents analyzed sample identity and number of cells shown in brackets. (D-E) Violin plot of expression of the indicated genes. (F) Immunohistochemistry of Prdm1 on corneal sections. (G) Heatmap presentation showing the average expression of selected cell cycle genes by each cluster. (H-I) Violin plots of proliferation genes (H) and co-immunofluorescent staining (I) of the indicated genes. (J-K) Wholemound immunostaining of Cd63 on K15-GFP transgenic cornea. The dashed squares shown in (J) are shown (DAPI only) at higher magnification in (K). (L) immunostaining of the indicated keratins on corneal sections. (M) Confocal image showing that Krt17+ epithelial cells express are EdU+ label-retaining cells (experiment described in Fig. 3E-G). The demarcated zone shown in enlarged view on the right and the arrows show EdU+/Krt17+ limbal epithelial cells at the outer limbus. Scale bars are 50  $\mu$ m. Abbreviations: Peri., periphery; CjB, conjunctival basal; CjS, conjunctival suprabasal; OLB, outer limbal basal; ILB, inner limbal basal; LS, limbal superficial; CB1, corneal basal 1; CB2, corneal basal 2; CW, corneal wing; CS, corneal superficial. Y-axis in D-E, H represents expression level.

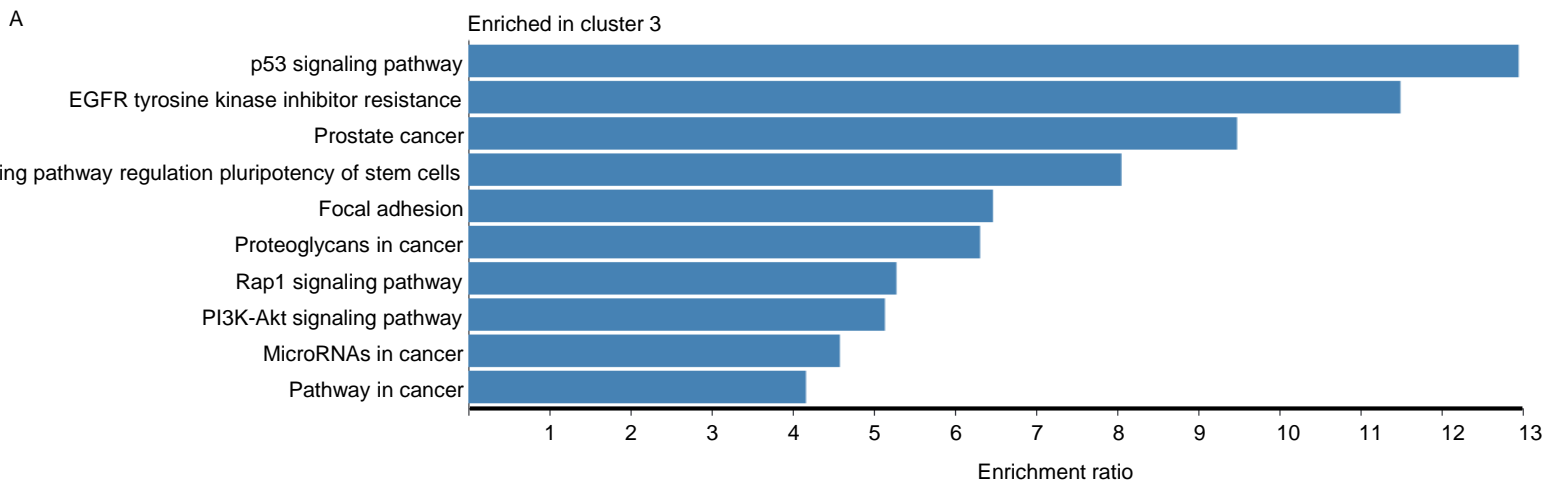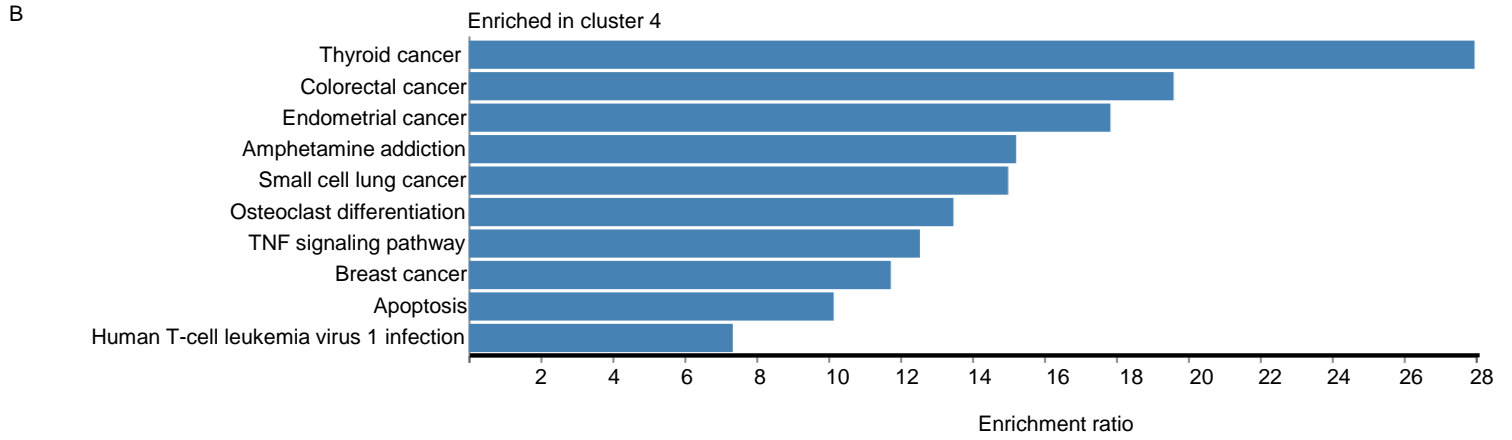

**Figure S2: Pathway enrichment for clusters 3 and 4 (related to figure 1).** In-silico analysis performed to predict pathways that were enriched in cluster 3 or 4 (in comparison to all other clusters) using the Webgestalt algorithm.

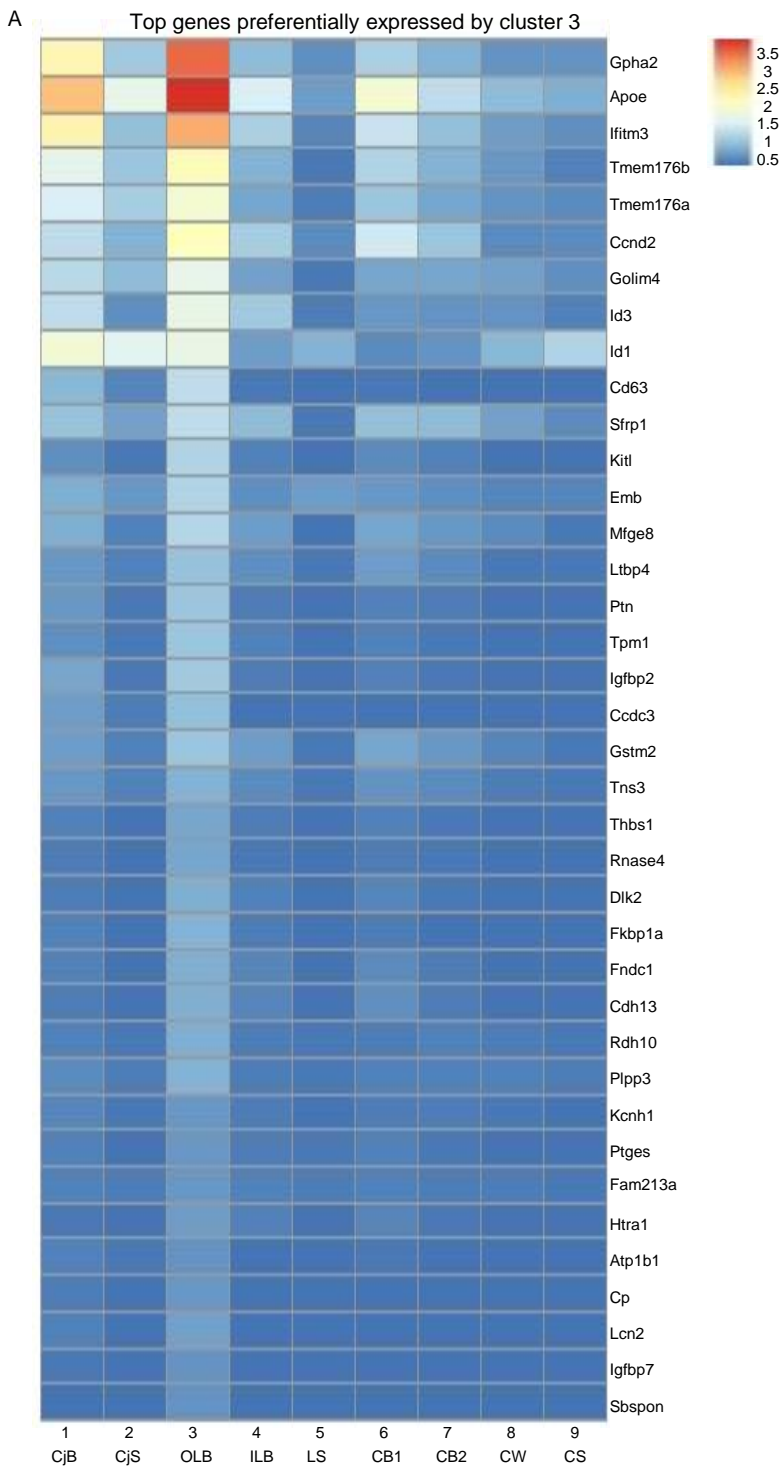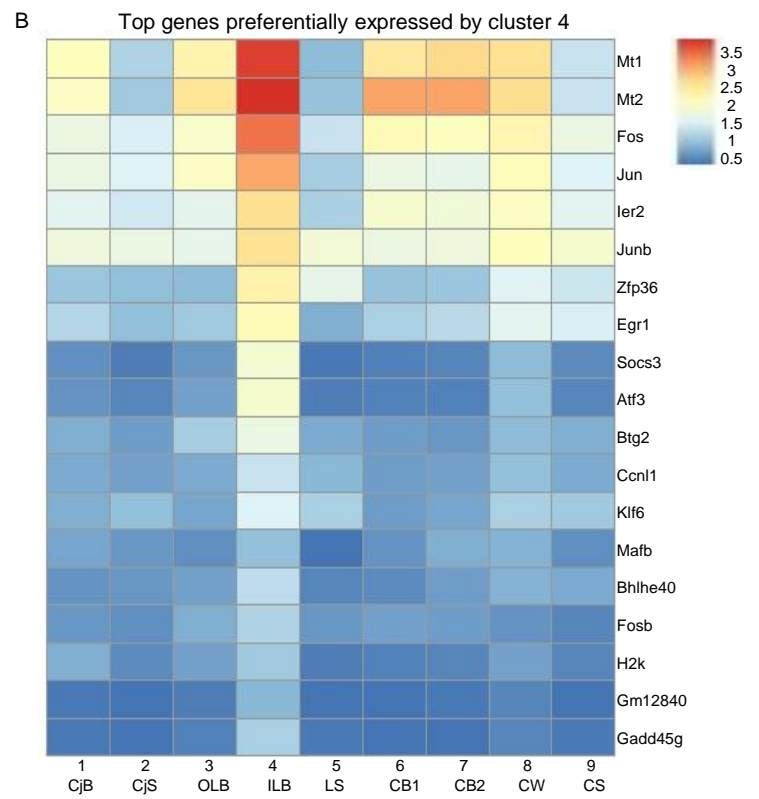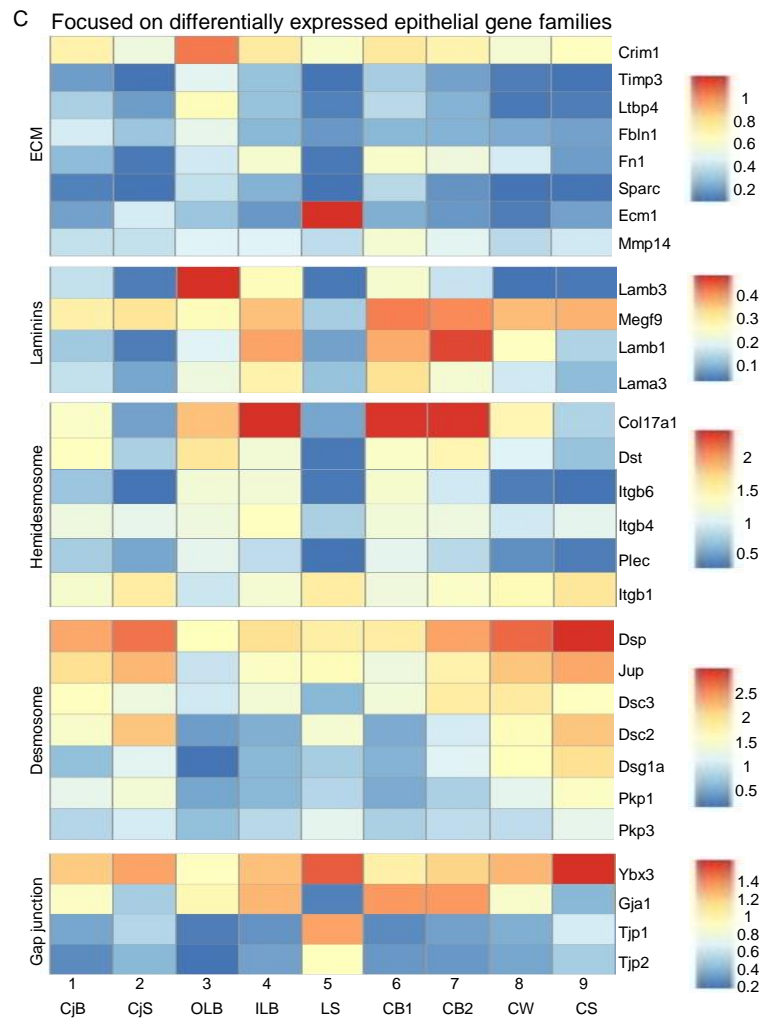

**Figure S3: Genes that were preferentially expressed by clusters 3-4 (related to figure 1).** Heatmap presentation shows the average expression of the indicated genes across the listed clusters. Genes enriched in cluster 3 (A) or cluster 4 (B) and selected family-related genes (C) are shown. Abbreviations: CjB, conjunctival basal; CjS, conjunctival suprabasal; OLB, outer limbal basal; ILB, inner limbal basal; LS, limbal superficial; CB1, corneal basal 1; CB2, corneal basal 2; CW, corneal wing; CS, corneal superficial.

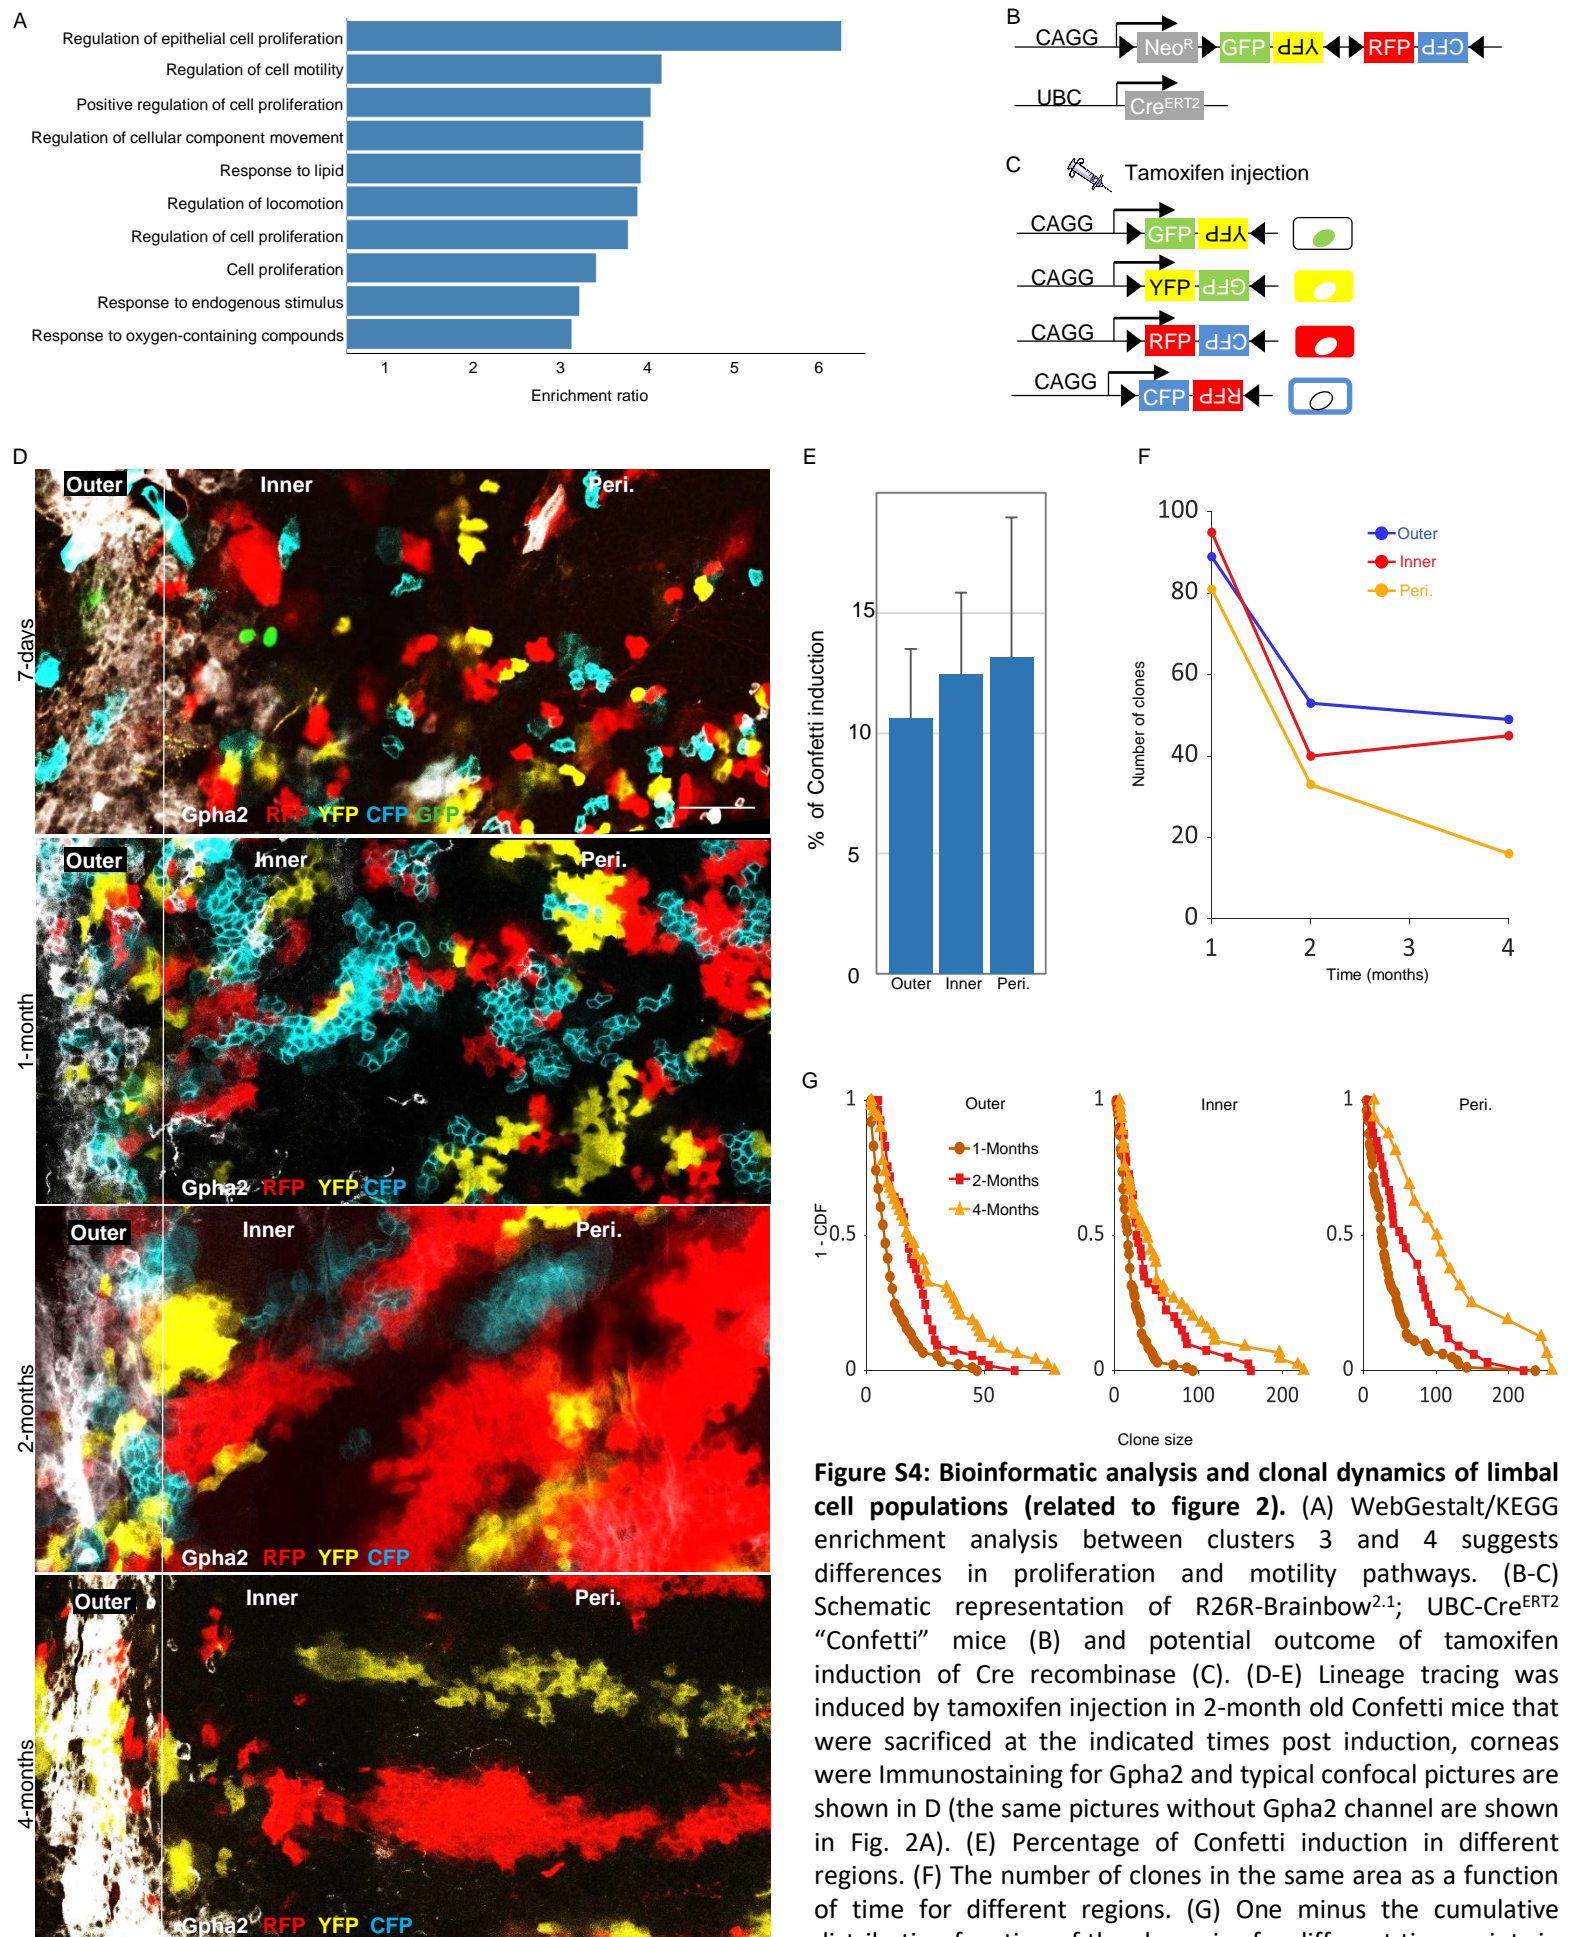

**Figure S4: Bioinformatic analysis and clonal dynamics of limbal cell populations (related to figure 2).** (A) WebGestalt/KEGG enrichment analysis between clusters 3 and 4 suggests differences in proliferation and motility pathways. (B-C) Schematic representation of R26R-Brainbow<sup>2.1</sup>; UBC-Cre<sup>ERT2</sup> “Confetti” mice (B) and potential outcome of tamoxifen induction of Cre recombinase (C). (D-E) Lineage tracing was induced by tamoxifen injection in 2-month old Confetti mice that were sacrificed at the indicated times post induction, corneas were immunostained for Gpha2 and typical confocal pictures are shown in D (the same pictures without Gpha2 channel are shown in Fig. 2A). (E) Percentage of Confetti induction in different regions. (F) The number of clones in the same area as a function of time for different regions. (G) One minus the cumulative distribution function of the clone size for different time points in different regions (compare to Fig 2H which shows the scaled distributions). Scale bars, 50  $\mu$ m. Abbreviations: Conj., Conjunctiva; Peri., Periphery.

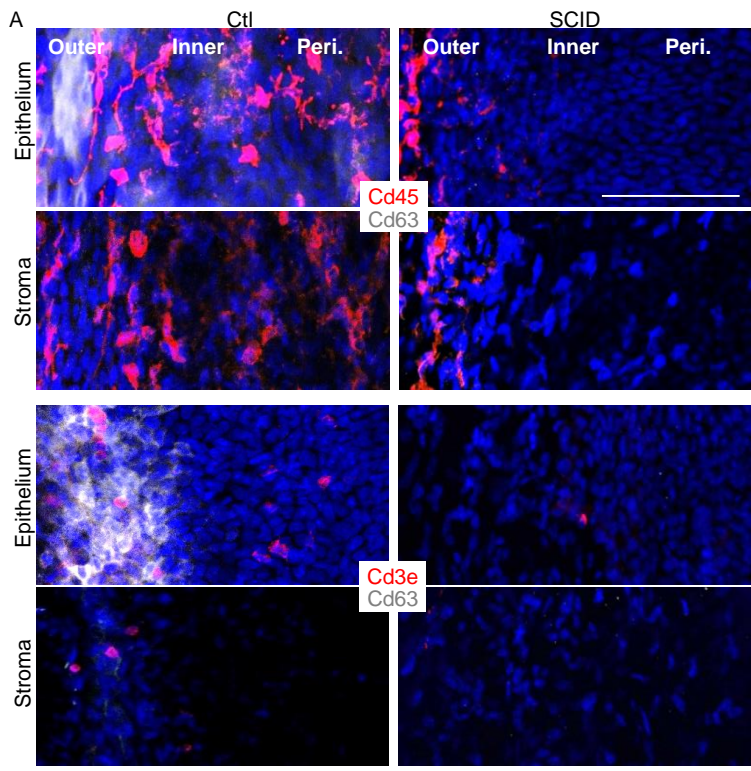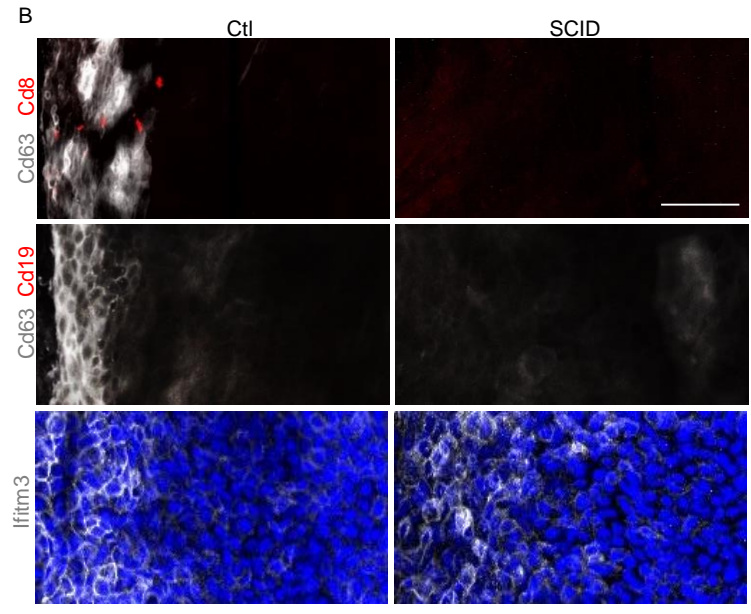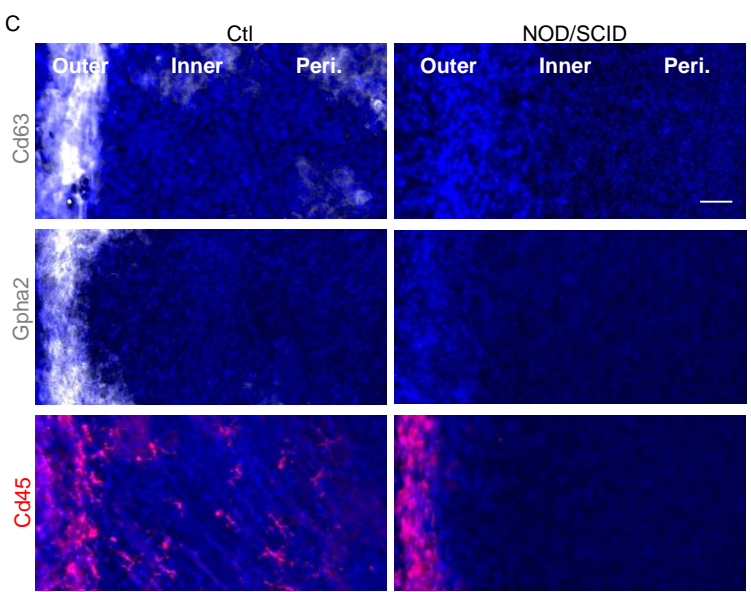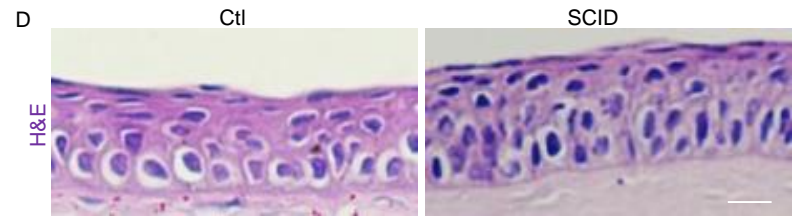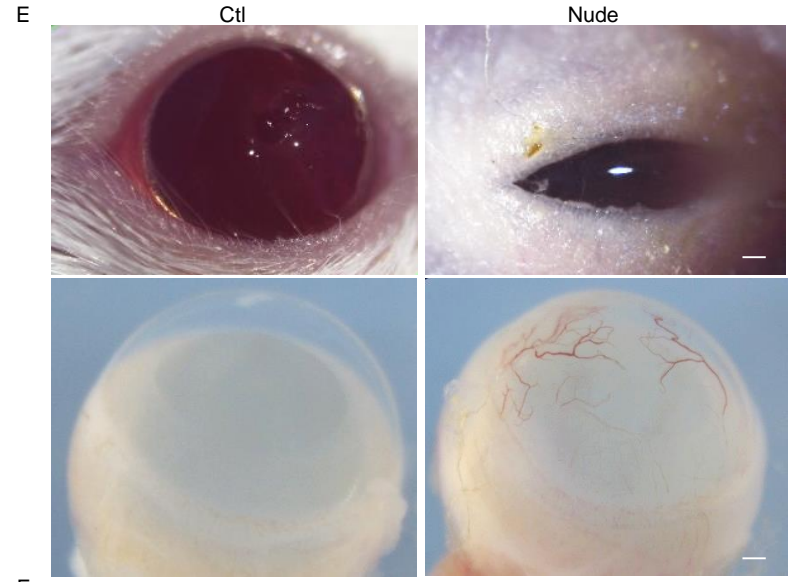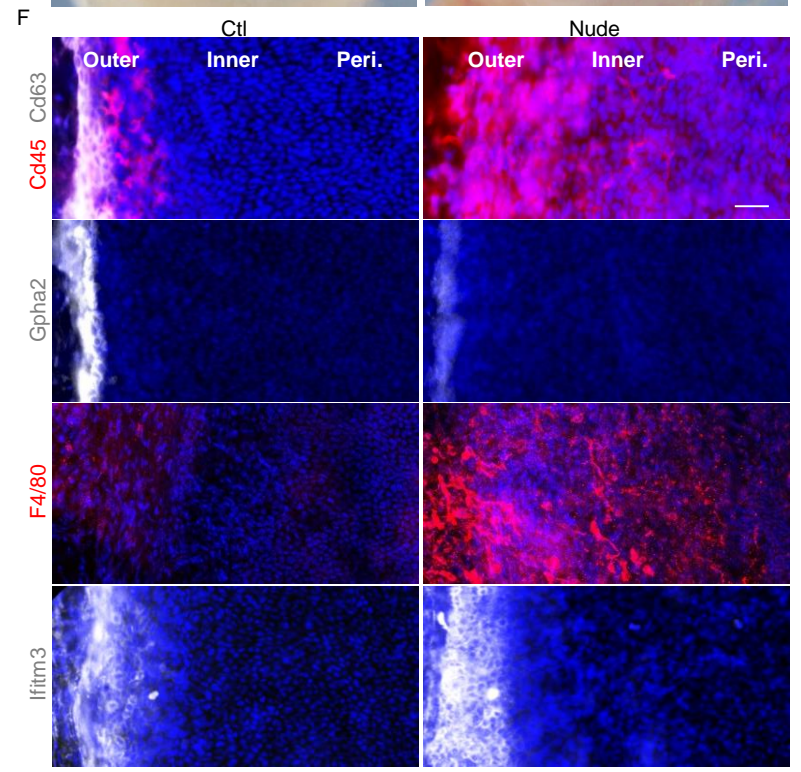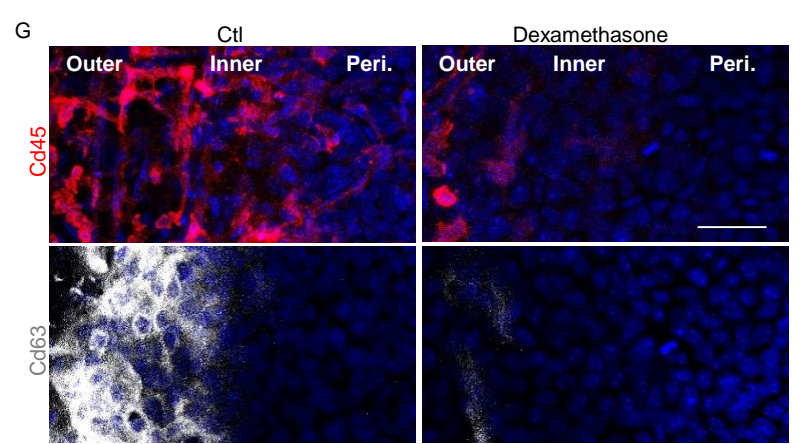

**Figure S5: Analysis of immune cells (related to figure 5).** Analysis of 2-months old cornea of the indicated immunodeficient mice or BALB/c that served as controls (Ctl). (A-C) Wholemout staining of the indicated genotypes using the surface markers of immune cells and the outer limbus marker. Z-stack confocal pictures of basal epithelial (epithelium) or anterior sub-epithelial stroma (stroma) are shown in A. (D) Histology (H&E) staining of corneal sections of the indicated mice. (E) Upper panel: typical pictures of the living mice showing eyelid abnormality and apparent inflammation in Nude mice. Lower panel: pictures of enucleated eyes of the indicated genotypes showing severe corneal neovascularization and opacification in Nude mice. (F) Wholemout staining of the indicated genotypes showing abnormal expression of outer limbus markers and Cd45+ especially F4/80+ cells invasion in Nude mouse. (G) The ocular surface of Ctl mice was topically treated with dexamethasone (or vehicle as control) for 4 days. Confocal images of corneas stained with the indicated antibodies are shown. Scale bars are 50  $\mu$ m. Abbreviations: Peri., Periphery.

| Krt12              | Gpha2               | Krt4               | Atf-3               |
|--------------------|---------------------|--------------------|---------------------|
| aagcgacatgctgttgc  | gaagactcctggctcct   | ggaggcagctgcaacgag | aatggcggctgcactgac  |
| ctggacagcgagaggtg  | ggacagctccaacagcaac | ggcgatcatggctgagag | aggaggtgagagcaggg   |
| cccattctgtgaggaag  | tgccatgggcatctgcaa  | cgcgacactgactgtc   | cctcaaataccagtgacc  |
| gatgaccccaaggctcg  | cttcagtgactccaggc   | aatagctgagcactgct  | aaggggtgtaggttagca  |
| gcccggcaactagaagc  | gctgtctctggctatgc   | aaaggcactcgttgac   | tctcagctctcttgac    |
| tcacagccaactccaaa  | caagtggcagcctgggat  | cagacatggagcctgagc | gtttattctggatggcga  |
| cataggcagaccaagcc  | cgtcacattgaaggggt   | aagccccagaagagcag  | gacatccgatggcagagg  |
| ccagaaagaagacctca  | aagtggcagggcagatcac | ccccgaggtgtaaaagac | aaactgactccagcgaga  |
| ttaccaggttaggaagct | ccgggaaagggaagcact  | gccacgctcatggagata | aggggctgtgttgacg    |
| cctcctctagagagcga  | aggtgatgttgccgat    | tatcctcaacgccgaag  | cgctcagactgggtgac   |
| accactctcgaatttgt  | gtgcagactgggaggaa   | aaagccaccgcaaaacc  | cctttcctctcatcttc   |
| tctggttccgtgttc    | ctcaccttctgaggctg   | cctcgaccgtgaaggag  | tttcgacactggcagca   |
| atcactctgagaccagc  | cacgactgagccacac    | cagactgggaagccagga | gcattcacactctccagt  |
| agtctcaatcagtggtg  | aagatctcaagctccca   | ttcctgaatacctccagc | aatctgggcttcagctc   |
| gttgctgactctggcaga | tatcacactggcagccc   | ctctgggtcaatctccac | gtgcaggtgagcatgta   |
| agccttgctgttcaatc  | tagcgggagaaacggcac  | ccgtgcgattttctgga  | cggacgatgcaggtgggc  |
| tcactctgaagtctcgg  | tgagccctcggggacta   | gctctaagaatccacct  | gtgtccgtcattctgag   |
| ttgatctcggcctccag  | tcagtggcagaccggag   | tggtgtgtgtctgctg   | aagaggttctctctct    |
| tctagttaggtcagctc  | gtttgagataccatgac   | gatccaggctttgggag  | ctctgcttagctctgcaa  |
| cattgacctcacctggac | taaagaggtcagagccc   | tcttctcaaggcgttga  | aagaactcccaattgcc   |
| gtgagatccactccagg  | gccaacctcatctcaca   | agctctgactgtaggcga | gtggggggaaaaggagg   |
| ttcaggtcggtaacctg  | gcaaggagactgctgaga  | actgtcctcatcatctt  | tttcaatgcttcagggg   |
| atctcaggttctgcacc  | ggacagagcgaaggaga   | tggtcttgaagtctcca  | gaagtgcacagaaagcca  |
| ccaggacgactctcatgg | gcattgctgtttattg    | ctttctgaggaccacga  | tcttgctgctggattc    |
| ccaggttcaagcagcagc | gtgtgctgggtagtggtc  | atgtaggcagcatccaca | ctactcggggcagagtg   |
| agttggcagcagtaacca | gggtctccttattggtag  | cctctaactccacctga  | acaagagatgctcctgcc  |
| caggctgccgatcagctg | accagcaagccagcttc   | ccttaaggcttccatct  | ctttgataggaccaccag  |
| cacctgtggagttgctc  | ctttgaagttgtcctct   | cagctccgctcatagag  | atcccttagtgggatcc   |
| ctgggtgccgactctg   |                     | catgtgtctgcatctggg | aggtagacacttctgct   |
| atctccaggcagccttg  |                     | ctgacatctggagctgct | cagccacagtgaggatg   |
| gcgtaggtctcaatctc  |                     | gctatctcattgtgttc  | tctcattccatctccct   |
| agggatgagctctctga  |                     | cattctgtgtgtcttca  | tggcattggacaacctc   |
| gatgggtctctcggtttg |                     | tgttctcaatctctgcc  | ttctgggacagaaacagca |
| tatctcctgcacactgt  |                     | agagtctggctctcttc  | ggataacctatgcacagt  |
| tgagaccacttccatt   |                     | ctcttgacttctccagac | cacaacaccaggctctga  |
| caagttcctgaacctggg |                     | taccgagatgctcacagc | tcatgcaatgtgtgca    |
| cggtgaggccttatatc  |                     | gggtggcggaaaggtgat | tctgatgaaactccggga  |
| cttcgatcccagaggag  |                     | tatcgtggggacctctg  | ccgacactcagaaatc    |
| cagtaactcctgctgga  |                     | cgcacaggagatcaggg  | agttcatgtggccacaca  |
| attcatatagcgcagga  |                     | gcaccaggaagactggag | tggtcatcagccagtttc  |
| ctggcraaaacagggtct |                     | aggcagagggggaagagt | gaaaggtgtctgctcattc |
| gaccaacctgcatagag  |                     | tcgtcctggaactgaggg | gccaaggcaaaagctgct  |
| gttgcaatgaagaccagc |                     | agaagctaccaggtcca  | ctgcactggcttccaac   |
| agggtgaaggtgatctgg |                     | caggatcaggtggaagcc | agtgccattaacatccca  |
| aagactcttcaggcca   |                     | ctgcagggtgatggagaa | tgctctggaccacatctc  |
| aaatggtccaggcgacca |                     | ttgtgacctgagagagc  | ggagatctccagctgaa   |
| tccgtcaaagctgtggga |                     | acgggacaccaagcagtc | caggctaggaatactggg  |
|                    |                     | gagagagagcaggggtg  | accaggtttgttccgat   |

Table S1: Stellaris FISH probes custom assay for: Krt12, Gpha2, Krt4 and Atf-3 (related to STAR Methods)
